# Supplementary material for: Identifying priority medicines policy issues for New Zealand: a general inductive study
Source: HighWire-hosted journal article supplement (doi:10.1136/bmjopen-2013-004415), 2014-05-01
Supplement: bmjopen-2013-004415supp.pdf [file bmjopen-2013-004415supp.pdf]

## Appendix One

### Questionnaire

#### 1. Medicines Policies

- What contribution medicines make to the health status of New Zealand(ers) ?
- Awareness of “Medicines New Zealand”; the New Zealand Medicines Strategy ?
- The impact of Medicines Policy upon access to medicines ?
- What if anything, could be done to improve Medicines Policy; Why and How?

#### 2. Medicines Access and Inequalities/Inequities on the basis of Ethnicity

- What is their view of medicines access and inequalities based on; the identified ethnicities ?
- What if anything, could be done to improve access and inequalities for these ethnicities ?

Note: the ethnicities were described as: Māori, Pacifica, Indian or Asian, or such people where English may not be a first language

#### 3. Pharmac

- Awareness of Pharmac’s pricing policy ?
- Description of Pharmac’s pricing policy ?
- Awareness of how Pharmac subsidises and funds medicines ?
- Pharmac’s impact upon access ?
- Opinion of Pharmac’s model of pricing in terms of cost effectiveness, cost utility and reference pricing ?
- How well Pharmac is performing it’s role, what impact has it had ?
- What is the future for Pharmac, in next 5,10,20 years. What could be the likely issues ?
- What if anything, could be improved in relation to Pharmac ?
- 

#### 4. Transpacific Partnership Agreement (TPP)

- With the likely TPP agreement with United States of America; what impact will it have on medicines procurement and availability and, why ?
- What needs to be considered with the TPP and access to medicines ?

#### 5. Accessing and Funding of High Cost Medicines

- Awareness of the accessing and funding of High Cost Medicines and opinion of the process ?
- Impact of Medicines Policy upon access to High Cost Medicines ?
- What improvements could be made in the accessing and funding of High Cost Medicines?

Note: a description of high cost medicines was given, such as; beyond the average person’s ability to afford e.g., some oncology and Rare Diseases medicines

#### 6. Supplementary Questions

- Have the above questions covered Medicines Policy ?
- Any other aspects of Medicines Policy affecting access, not covered ?
- Will the current system of medicines access continue, or not ?
- What is the future for Medicines Policy ?

Anything else to say in relation to Medicines Policy and the accessing of medicines ?
